# Supplementary material for: Growth Performance and Fecal Microbiota of Dairy Calves Supplemented with Autochthonous Lactic Acid Bacteria as Probiotics in Mexican Western Family Dairy Farming
Source: MDPI journal article supplement (doi:10.3390/ani13182841), 2023-09-07
Supplement: s1 [file s1]

# Growth performance and fecal microbiota of dairy calves supplemented with autochthonous lactic acid bacteria as probiotics in Mexican western family dairy farming

## Supplementary material

**Table S1.** Weight and height gain at eight weeks of Holstein calves treated with probiotics during the milk-feeding period.

| Parameter                | Treatment  |            |            |            | <i>p</i> -value |
|--------------------------|------------|------------|------------|------------|-----------------|
|                          | Control    | Strain 6BZ | Strain 6BY | 6BY+6BZ    |                 |
| Daily weight gain, kg/d* | 0.627±0.04 | 0.598±0.05 | 0.669±0.05 | 0.682±0.03 | 0.456           |
| Daily height gain, cm/d* | 0.287±0.02 | 0.218±0.02 | 0.241±0.02 | 0.269±0.01 | 0.080           |

\* Average value ± standard error.
